# Supplementary material for: Examining the Association of Grit Profiles With Big Five Personality and Achievement Among Iranian Foreign Language Learners
Source: Frontiers journal article supplement (doi:10.3389/fpsyg.2021.801844), 2021-12-24
Supplement: Data_Sheet_1.pdf [file Data_Sheet_1.pdf]

## **APPENDIX A**

### **Short Grit Scale**

*Directions for taking the Grit Scale: Please respond to the following 8 items. Be honest – there are no right or wrong answers!*

1. New ideas and projects sometimes distract me from previous ones.\*

- ☐ Very much like me
- ☐ Mostly like me
- ☐ Somewhat like me
- ☐ Not much like me
- ☐ Not like me at all

2. Setbacks don't discourage me.

- ☐ Very much like me
- ☐ Mostly like me
- ☐ Somewhat like me
- ☐ Not much like me
- ☐ Not like me at all

3. I have been obsessed with a certain idea or project for a short time but later lost interest.\*

- ☐ Very much like me
- ☐ Mostly like me
- ☐ Somewhat like me
- ☐ Not much like me
- ☐ Not like me at all

4. I am a hard worker.

- ☐ Very much like me
- ☐ Mostly like me
- ☐ Somewhat like me
- ☐ Not much like me
- ☐ Not like me at all

5. I often set a goal but later choose to pursue a different one.\*

- ☐ Very much like me
- ☐ Mostly like me
- ☐ Somewhat like me
- ☐ Not much like me
- ☐ Not like me at all

6. I have difficulty maintaining my focus on projects that take more than a few months to complete.\*

- ☐ Very much like me
- ☐ Mostly like me
- ☐ Somewhat like me
- ☐ Not much like me
- ☐ Not like me at all

7. I finish whatever I begin.

- ☐ Very much like me
- ☐ Mostly like me
- ☐ Somewhat like me
- ☐ Not much like me
- ☐ Not like me at all

8. I am diligent.

- ☐ Very much like me
- ☐ Mostly like me
- ☐ Somewhat like me
- ☐ Not much like me
- ☐ Not like me at all
